# Supplementary material for: Ribozyme activity modulates the physical properties of RNA–peptide coacervates
Source: eLife journal article supplement (doi:10.7554/elife.83543), 2023-06-02
Supplement: fig1-data2 [file Figure 1 - source data 2 - turbidity data.xlsx]

## Sheet: Sheet1
		A500 (au)
		(Lys)5-24			(Lys)19-72
	(Lys)n:RNA	Replicate 1	Replicate 2	Replicate 3	Replicate 1	Replicate 2	Replicate 3
	0	0.05	0.08	0.06	0.07	0.09	0.04
	0.25	0.06	0.09	0.08	0.34	0.44	0.36
	0.5	0.07	0.1	0.07	2.03	2.33	2.08
	0.75	0.08	0.11	0.37	3.07	3.1	2.5
	1	0.1	0.09	0.08	2.3	3.21	3.07
	1.25	0.13	0.72	0.82	3.37	3.74	2.79
	1.5	0.64	1.23	1.09	3.58	3.54	3.04
	2	1.72	1.91	1.67	3.74	3.23	2.98
	3	2.43	2.4	2.1	3.77	3.37	2.67
	4	2.68	2.45	2.46	3.68	3.24	3.04
