# Supplementary material for: Ribozyme activity modulates the physical properties of RNA–peptide coacervates
Source: eLife journal article supplement (doi:10.7554/elife.83543), 2023-06-02
Supplement: fig1-figsupp2-data4 [file elife-83543-fig1-figsupp2-data4-v1.zip]

## Sheet: Sheet1
Source data kinetics - band assignment
File	Band	Sample	Timepoint (min)	Repeat
Figure 1 - source data 4 - raw kinetics gel solution 0-120min	1	Solution	0	1
Figure 1 - source data 4 - raw kinetics gel solution 0-120min	2	Solution	2	1
Figure 1 - source data 4 - raw kinetics gel solution 0-120min	3	Solution	5	1
Figure 1 - source data 4 - raw kinetics gel solution 0-120min	4	Solution	10	1
Figure 1 - source data 4 - raw kinetics gel solution 0-120min	5	Solution	20	1
Figure 1 - source data 4 - raw kinetics gel solution 0-120min	6	Solution	30	1
Figure 1 - source data 4 - raw kinetics gel solution 0-120min	7	Solution	60	1
Figure 1 - source data 4 - raw kinetics gel solution 0-120min	8	Solution	120	1
Figure 1 - source data 4 - raw kinetics gel solution 0-120min	9	Solution	0	2
Figure 1 - source data 4 - raw kinetics gel solution 0-120min	10	Solution	2	2
Figure 1 - source data 4 - raw kinetics gel solution 0-120min	11	Solution	5	2
Figure 1 - source data 4 - raw kinetics gel solution 0-120min	12	Solution	10	2
Figure 1 - source data 4 - raw kinetics gel solution 0-120min	13	Solution	20	2
Figure 1 - source data 4 - raw kinetics gel solution 0-120min	14	Solution	30	2
Figure 1 - source data 4 - raw kinetics gel solution 0-120min	15	Solution	60	2
Figure 1 - source data 4 - raw kinetics gel solution 0-120min	16	Solution	120	2
Figure 1 - source data 4 - raw kinetics gel solution 0-120min	17	Solution	0	3
Figure 1 - source data 4 - raw kinetics gel solution 0-120min	18	Solution	2	3
Figure 1 - source data 4 - raw kinetics gel solution 0-120min	19	Solution	5	3
Figure 1 - source data 4 - raw kinetics gel solution 0-120min	20	Solution	10	3
Figure 1 - source data 4 - raw kinetics gel solution 0-120min	21	Solution	20	3
Figure 1 - source data 4 - raw kinetics gel solution 0-120min	22	Solution	30	3
Figure 1 - source data 4 - raw kinetics gel solution 0-120min	23	Solution	60	3
Figure 1 - source data 4 - raw kinetics gel solution 0-120min	24	Solution	120	3
Figure 1 - source data 4 - raw kinetics gel 19-72 kDa 0-120min	1	0.75:1 (Lys)19-72:RNA	0	1
Figure 1 - source data 4 - raw kinetics gel 19-72 kDa 0-120min	2	0.75:1 (Lys)19-72:RNA	2	1
Figure 1 - source data 4 - raw kinetics gel 19-72 kDa 0-120min	3	0.75:1 (Lys)19-72:RNA	5	1
Figure 1 - source data 4 - raw kinetics gel 19-72 kDa 0-120min	4	0.75:1 (Lys)19-72:RNA	10	1
Figure 1 - source data 4 - raw kinetics gel 19-72 kDa 0-120min	5	0.75:1 (Lys)19-72:RNA	20	1
Figure 1 - source data 4 - raw kinetics gel 19-72 kDa 0-120min	6	0.75:1 (Lys)19-72:RNA	30	1
Figure 1 - source data 4 - raw kinetics gel 19-72 kDa 0-120min	7	0.75:1 (Lys)19-72:RNA	60	1
Figure 1 - source data 4 - raw kinetics gel 19-72 kDa 0-120min	8	0.75:1 (Lys)19-72:RNA	120	1
Figure 1 - source data 4 - raw kinetics gel 19-72 kDa 0-120min	9	0.75:1 (Lys)19-72:RNA	0	2
Figure 1 - source data 4 - raw kinetics gel 19-72 kDa 0-120min	10	0.75:1 (Lys)19-72:RNA	2	2
Figure 1 - source data 4 - raw kinetics gel 19-72 kDa 0-120min	11	0.75:1 (Lys)19-72:RNA	5	2
Figure 1 - source data 4 - raw kinetics gel 19-72 kDa 0-120min	12	0.75:1 (Lys)19-72:RNA	10	2
Figure 1 - source data 4 - raw kinetics gel 19-72 kDa 0-120min	13	0.75:1 (Lys)19-72:RNA	20	2
Figure 1 - source data 4 - raw kinetics gel 19-72 kDa 0-120min	14	0.75:1 (Lys)19-72:RNA	30	2
Figure 1 - source data 4 - raw kinetics gel 19-72 kDa 0-120min	15	0.75:1 (Lys)19-72:RNA	60	2
Figure 1 - source data 4 - raw kinetics gel 19-72 kDa 0-120min	16	0.75:1 (Lys)19-72:RNA	120	2
Figure 1 - source data 4 - raw kinetics gel 19-72 kDa 0-120min	17	0.75:1 (Lys)19-72:RNA	0	3
Figure 1 - source data 4 - raw kinetics gel 19-72 kDa 0-120min	18	0.75:1 (Lys)19-72:RNA	2	3
Figure 1 - source data 4 - raw kinetics gel 19-72 kDa 0-120min	19	0.75:1 (Lys)19-72:RNA	5	3
Figure 1 - source data 4 - raw kinetics gel 19-72 kDa 0-120min	20	0.75:1 (Lys)19-72:RNA	10	3
Figure 1 - source data 4 - raw kinetics gel 19-72 kDa 0-120min	21	0.75:1 (Lys)19-72:RNA	20	3
Figure 1 - source data 4 - raw kinetics gel 19-72 kDa 0-120min	22	0.75:1 (Lys)19-72:RNA	30	3
Figure 1 - source data 4 - raw kinetics gel 19-72 kDa 0-120min	23	0.75:1 (Lys)19-72:RNA	60	3
Figure 1 - source data 4 - raw kinetics gel 19-72 kDa 0-120min	24	0.75:1 (Lys)19-72:RNA	120	3
Figure 1 - source data 4 - raw kinetics gel 5-24 kDa 0-120min	1	3:1 (Lys)5-24:RNA	0	1
Figure 1 - source data 4 - raw kinetics gel 5-24 kDa 0-120min	2	3:1 (Lys)5-24:RNA	2	1
Figure 1 - source data 4 - raw kinetics gel 5-24 kDa 0-120min	3	3:1 (Lys)5-24:RNA	5	1
Figure 1 - source data 4 - raw kinetics gel 5-24 kDa 0-120min	4	3:1 (Lys)5-24:RNA	10	1
Figure 1 - source data 4 - raw kinetics gel 5-24 kDa 0-120min	5	3:1 (Lys)5-24:RNA	20	1
Figure 1 - source data 4 - raw kinetics gel 5-24 kDa 0-120min	6	3:1 (Lys)5-24:RNA	30	1
Figure 1 - source data 4 - raw kinetics gel 5-24 kDa 0-120min	7	3:1 (Lys)5-24:RNA	60	1
Figure 1 - source data 4 - raw kinetics gel 5-24 kDa 0-120min	8	3:1 (Lys)5-24:RNA	120	1
Figure 1 - source data 4 - raw kinetics gel 5-24 kDa 0-120min	9	3:1 (Lys)5-24:RNA	0	2
Figure 1 - source data 4 - raw kinetics gel 5-24 kDa 0-120min	10	3:1 (Lys)5-24:RNA	2	2
Figure 1 - source data 4 - raw kinetics gel 5-24 kDa 0-120min	11	3:1 (Lys)5-24:RNA	5	2
Figure 1 - source data 4 - raw kinetics gel 5-24 kDa 0-120min	12	3:1 (Lys)5-24:RNA	10	2
Figure 1 - source data 4 - raw kinetics gel 5-24 kDa 0-120min	13	3:1 (Lys)5-24:RNA	20	2
Figure 1 - source data 4 - raw kinetics gel 5-24 kDa 0-120min	14	3:1 (Lys)5-24:RNA	30	2
Figure 1 - source data 4 - raw kinetics gel 5-24 kDa 0-120min	15	3:1 (Lys)5-24:RNA	60	2
Figure 1 - source data 4 - raw kinetics gel 5-24 kDa 0-120min	16	3:1 (Lys)5-24:RNA	120	2
Figure 1 - source data 4 - raw kinetics gel 5-24 kDa 0-120min	17	3:1 (Lys)5-24:RNA	0	3
Figure 1 - source data 4 - raw kinetics gel 5-24 kDa 0-120min	18	3:1 (Lys)5-24:RNA	2	3
Figure 1 - source data 4 - raw kinetics gel 5-24 kDa 0-120min	19	3:1 (Lys)5-24:RNA	5	3
Figure 1 - source data 4 - raw kinetics gel 5-24 kDa 0-120min	20	3:1 (Lys)5-24:RNA	10	3
Figure 1 - source data 4 - raw kinetics gel 5-24 kDa 0-120min	21	3:1 (Lys)5-24:RNA	20	3
Figure 1 - source data 4 - raw kinetics gel 5-24 kDa 0-120min	22	3:1 (Lys)5-24:RNA	30	3
Figure 1 - source data 4 - raw kinetics gel 5-24 kDa 0-120min	23	3:1 (Lys)5-24:RNA	60	3
Figure 1 - source data 4 - raw kinetics gel 5-24 kDa 0-120min	24	3:1 (Lys)5-24:RNA	120	3
Figure 1 - source data 4 - raw kinetics gel all samples 180-240min	1	Solution	180	1
Figure 1 - source data 4 - raw kinetics gel all samples 180-240min	2	Solution	180	2
Figure 1 - source data 4 - raw kinetics gel all samples 180-240min	3	Solution	180	3
Figure 1 - source data 4 - raw kinetics gel all samples 180-240min	4	3:1 (Lys)5-24:RNA	180	1
Figure 1 - source data 4 - raw kinetics gel all samples 180-240min	5	3:1 (Lys)5-24:RNA	180	2
Figure 1 - source data 4 - raw kinetics gel all samples 180-240min	6	3:1 (Lys)5-24:RNA	180	3
Figure 1 - source data 4 - raw kinetics gel all samples 180-240min	7	0.75:1 (Lys)19-72:RNA	180	1
Figure 1 - source data 4 - raw kinetics gel all samples 180-240min	8	0.75:1 (Lys)19-72:RNA	180	2
Figure 1 - source data 4 - raw kinetics gel all samples 180-240min	9	0.75:1 (Lys)19-72:RNA	180	3
Figure 1 - source data 4 - raw kinetics gel all samples 180-240min	10	Solution	240	1
Figure 1 - source data 4 - raw kinetics gel all samples 180-240min	11	Solution	240	2
Figure 1 - source data 4 - raw kinetics gel all samples 180-240min	12	Solution	240	3
Figure 1 - source data 4 - raw kinetics gel all samples 180-240min	13	3:1 (Lys)5-24:RNA	240	1
Figure 1 - source data 4 - raw kinetics gel all samples 180-240min	14	3:1 (Lys)5-24:RNA	240	2
Figure 1 - source data 4 - raw kinetics gel all samples 180-240min	15	3:1 (Lys)5-24:RNA	240	3
Figure 1 - source data 4 - raw kinetics gel all samples 180-240min	16	0.75:1 (Lys)19-72:RNA	240	1
Figure 1 - source data 4 - raw kinetics gel all samples 180-240min	17	0.75:1 (Lys)19-72:RNA	240	2
Figure 1 - source data 4 - raw kinetics gel all samples 180-240min	18	0.75:1 (Lys)19-72:RNA	240	3
