# Supplementary material for: Ribozyme activity modulates the physical properties of RNA–peptide coacervates
Source: eLife journal article supplement (doi:10.7554/elife.83543), 2023-06-02
Supplement: fig2-data1 [file Figure 2 - source data 1.xlsx]

## Sheet: Cy5 average particle data
Passivated
Ribozyme	pL ratio	Time	Area (μm2)	Area_SEM	Particle count	Particle count / 100 μm2	Particle count SEM	Circularity	Circularity SEM
Active	0.75:1 (Lys)19-72:RNA	0.5 h	10.5472	0.0793718	5272	1.312	0.1864	0.85786	0.000572923
Active	0.75:1 (Lys)19-72:RNA	1 h	11.0622	0.0881752	5006	1.2458	0.20214	0.85695	0.000591217
Active	0.75:1 (Lys)19-72:RNA	2 h	10.5892	0.0902824	4900	1.21942	0.210798	0.85943	0.000607299
Active	0.75:1 (Lys)19-72:RNA	24 h	10.3725	0.0918206	4800	1.19454	0.211272	0.858935	0.000652613
Inactive	0.75:1 (Lys)19-72:RNA	0.5 h	16.7942	0.15368	3016	0.750568	0.0440588	0.860085	0.00086559
Inactive	0.75:1 (Lys)19-72:RNA	1 h	19.9393	0.214156	2321	0.577609	0.049067	0.859276	0.00102025
Inactive	0.75:1 (Lys)19-72:RNA	2 h	22.7109	0.304808	1891	0.470598	0.0497957	0.853249	0.00119797
Inactive	0.75:1 (Lys)19-72:RNA	24 h	22.4728	0.338149	1702	0.423563	0.0520438	0.858264	0.00139904
