# Supplementary material for: Ribozyme activity modulates the physical properties of RNA–peptide coacervates
Source: eLife journal article supplement (doi:10.7554/elife.83543), 2023-06-02
Supplement: fig2-data2 [file Figure 2 - source data 2.xlsx]

## Sheet: Cy5 average particle data
Unpassivated
Ribozyme	pL ratio	Time	Area (μm2)	Area_SEM	Particle count	Particle count / 100 μm2	Particle count SEM	Circularity	Circularity SEM
Active	0.75:1 (Lys)19-72:RNA	0.5 h	17.7098	0.380345	476	1.06612	N/A	0.744712	0.0025283
Active	0.75:1 (Lys)19-72:RNA	1 h	17.4939	0.364962	515	1.15348	N/A	0.74727	0.00222047
Active	0.75:1 (Lys)19-72:RNA	2 h	18.2923	0.381517	513	1.149	N/A	0.74907	0.00211496
Active	0.75:1 (Lys)19-72:RNA	24 h	17.9449	0.345464	518	1.16019	N/A	0.747749	0.00218386
Inactive	0.75:1 (Lys)19-72:RNA	0.5 h	39.0303	1.09135	414	0.92726	N/A	0.708768	0.00312293
Inactive	0.75:1 (Lys)19-72:RNA	1 h	49.2912	1.55156	314	0.703284	N/A	0.690799	0.00441202
Inactive	0.75:1 (Lys)19-72:RNA	2 h	72.9286	2.77714	244	0.546501	N/A	0.650533	0.00619673
Inactive	0.75:1 (Lys)19-72:RNA	24 h	101.455	4.17312	199	0.445712	N/A	0.63692	0.00651127
