# Supplementary material for: Ribozyme activity modulates the physical properties of RNA–peptide coacervates
Source: eLife journal article supplement (doi:10.7554/elife.83543), 2023-06-02
Supplement: fig2-figsupp2-data1 [file elife-83543-fig2-figsupp2-data1-v1.zip]

## Sheet: Cy5 average particle data
Passivated
Ribozyme	pL ratio	Time	Area (μm2)	Area_SEM	Particle count	Particle count / 100 μm2	Particle count SEM	Circularity	Circularity SEM
Active	3:1 (Lys)5-24:RNA	0.5 h	16.7645	0.244588	3142	0.781924	0.0787723	0.834426	0.00105287
Active	3:1 (Lys)5-24:RNA	1 h	18.5928	0.292686	2497	0.621408	0.0951854	0.851217	0.00101027
Active	3:1 (Lys)5-24:RNA	2 h	17.5923	0.291783	2293	0.57064	0.102078	0.852846	0.000991099
Active	3:1 (Lys)5-24:RNA	24 h	16.7565	0.316343	2083	0.518379	0.114893	0.859519	0.00104976
Inactive	3:1 (Lys)5-24:RNA	0.5 h	14.6976	0.144514	3217	0.800589	0.0451115	0.860762	0.000800312
Inactive	3:1 (Lys)5-24:RNA	1 h	17.6411	0.206249	2452	0.610209	0.0495385	0.861289	0.000862744
Inactive	3:1 (Lys)5-24:RNA	2 h	19.0132	0.250554	2087	0.519375	0.0487679	0.85986	0.00110027
Inactive	3:1 (Lys)5-24:RNA	24 h	19.1862	0.263209	1921	0.478064	0.0462644	0.863123	0.00102008
