# Supplementary material for: Ribozyme activity modulates the physical properties of RNA–peptide coacervates
Source: eLife journal article supplement (doi:10.7554/elife.83543), 2023-06-02
Supplement: fig2-figsupp2-data2 [file elife-83543-fig2-figsupp2-data2-v1.zip]

## Sheet: Cy5 average particle data
Unpassivated
Ribozyme	pL ratio	Time	Area (μm2)	Area_SEM	Particle count	Particle count / 100 μm2	Particle count SEM	Circularity	Circularity SEM
Active	3:1 (Lys)5-24:RNA	0.5 h	19.0292	0.498997	319	0.714483	N/A	0.746028	0.00267054
Active	3:1 (Lys)5-24:RNA	1 h	19.7019	0.5093	359	0.804073	N/A	0.745067	0.00267922
Active	3:1 (Lys)5-24:RNA	2 h	19.6856	0.495975	359	0.804073	N/A	0.741006	0.00275025
Active	3:1 (Lys)5-24:RNA	24 h	20.2439	0.552053	325	0.727921	N/A	0.745785	0.00263963
Inactive	3:1 (Lys)5-24:RNA	0.5 h	36.2145	1.0223	285	0.638331	N/A	0.713375	0.00422476
Inactive	3:1 (Lys)5-24:RNA	1 h	54.7963	1.7839	286	0.640571	N/A	0.66479	0.0054321
Inactive	3:1 (Lys)5-24:RNA	2 h	86.6694	2.84413	216	0.483788	N/A	0.650509	0.00596273
Inactive	3:1 (Lys)5-24:RNA	24 h	84.6551	13.2404	16	0.0358361	N/A	0.69	0.0138242
