# Supplementary material for: Ribozyme activity modulates the physical properties of RNA–peptide coacervates
Source: eLife journal article supplement (doi:10.7554/elife.83543), 2023-06-02
Supplement: fig3-figsupp2-data1 [file elife-83543-fig3-figsupp2-data1-v1.zip]

## Sheet: Figure 3 - source data 1
Ribozyme	pL ratio	Time	Area (m2)	Area_SEM	Particle count / 100 m2	Particle count SEM	Circularity	Circularity SEM	FAM/Cy5 intensity ratio	PCCpop	PCCpop SEM	PCCdroplet	PCCdroplet SEM
Active	0.75:1 (Lys)19-72:RNA	0.5 h	12.3836	0.140708	0.970455	0.0683554	0.84075	0.00068218	0.530774	-0.396286	0.171793	0.232555	0.00616283
Active	0.75:1 (Lys)19-72:RNA	1 h	12.9472	0.184713	0.855907	0.0599446	0.840325	0.000729316	0.568117	-0.564857	0.075507	0.453081	0.00573847
Active	0.75:1 (Lys)19-72:RNA	2 h	13.1319	0.194662	0.889184	0.0925569	0.840103	0.000724439	0.614427	-0.540143	0.0533825	0.684476	0.00410947
Active	0.75:1 (Lys)19-72:RNA	24 h	12.9538	0.182195	0.888624	0.09437	0.840204	0.000731679	0.565855	-0.456875	0.0462035	0.806157	0.00253397
Inactive	0.75:1 (Lys)19-72:RNA	0.5 h	14.9993	0.166554	0.768237	0.0627185	0.840241	0.000884109	0.471836	-0.336167	0.0226781	0.352944	0.00688
Inactive	0.75:1 (Lys)19-72:RNA	1 h	16.8907	0.224976	0.667074	0.0801099	0.841825	0.000886804	0.460651	-0.274	0.0625929	0.602349	0.00547959
Inactive	0.75:1 (Lys)19-72:RNA	2 h	18.4448	0.307	0.567405	0.0846847	0.840568	0.00104088	0.503337	0.0433333	0.0538459	0.808982	0.00340697
Inactive	0.75:1 (Lys)19-72:RNA	24 h	18.8565	0.376542	0.503945	0.100608	0.838519	0.00122789	0.536307	0.566333	0.0318985	0.869338	0.0028279
Active	3:1 (Lys)5-24:RNA	0.5 h	14.4514	0.185224	1.07956	0.134747	0.821986	0.000968701	0.506768	-0.11125	0.0672587	0.444047	0.00769281
Active	3:1 (Lys)5-24:RNA	1 h	15.1295	0.225357	1.03327	0.189251	0.835272	0.000832117	0.633561	0.110833	0.0694115	0.622403	0.00446841
Active	3:1 (Lys)5-24:RNA	2 h	16.9763	0.301885	0.737627	0.145692	0.832257	0.00119884	0.572969	0.643833	0.0859304	0.767557	0.00346565
Active	3:1 (Lys)5-24:RNA	24 h	15.8464	0.282607	0.726926	0.0828215	0.836705	0.000850713	0.568284	0.780444	0.0406626	0.787956	0.00264587
Inactive	3:1 (Lys)5-24:RNA	0.5 h	19.0998	0.214782	0.607223	0.0302562	0.834895	0.000850683	0.519375	0.433778	0.0386874	0.670841	0.00477439
Inactive	3:1 (Lys)5-24:RNA	1 h	25.6842	0.371955	0.423065	0.0468991	0.836861	0.0010462	0.518389	0.720111	0.03321	0.815718	0.00416148
Inactive	3:1 (Lys)5-24:RNA	2 h	29.3366	0.504035	0.335217	0.0513709	0.836241	0.00132515	0.519595	0.873778	0.0249426	0.887146	0.00291476
Inactive	3:1 (Lys)5-24:RNA	24 h	29.8997	0.5889	0.284449	0.0540553	0.835164	0.00159406	0.560672	0.925889	0.0125891	0.890083	0.00281803
